# Supplementary material for: Controlled electro-coalescence/non-coalescence on lubricating fluid infused slippery surfaces
Source: Royal Society of Chemistry journal article supplement (doi:10.1039/c5ra21936a), 2015-01-01
Supplement: c5ra21936a3.pdf [file c5ra21936a3.pdf]

## Supporting Information

### Controlled Electro-coalescence / non-coalescence on Lubricating Fluid Infused Slippery

#### Surfaces

*Jitesh Barman, Arun Kumar Nagarajan and Krishnacharya Khare\**

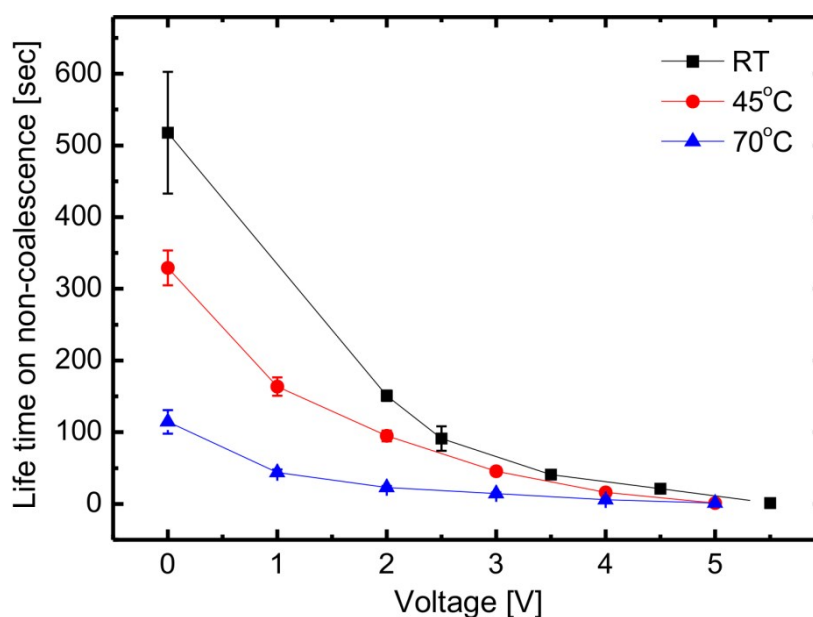

Figure S1: Life time of non-coalescence of two aqueous drops as a function of applied ac voltage three different temperatures.

Assumptions to derive model for electric field induced drainage of oil film between two aqueous drops:

- i. Lubricating fluid is a Newtonian fluid in isothermal condition.
- ii. Aqueous drops are semi spherical with identical radii,  $R$  i.e. ( $R_1=R_2=R$ )
- iii. Thickness of the oil film between aqueous drops is constant at any given time,  $T(t)$ , and does not vary along the radial axis.

- iv. Radius of the oil film between aqueous drops ( $a$ ) does not vary during oil drainage and only its thickness decreases.
- v. Viscous force dominate during oil drainage the inertial terms can be neglected in the governing flow equation.
- vi. Oil film thickness  $T(t) \ll a$ , therefore within the lubrication approximation only radial velocity  $u_r(z,t)$  of draining oil is considered.

- vii. Laminar (Poiseuille) flow is assumed such that  $\frac{\partial P}{\partial r} = -\frac{\Delta P(t)}{a}$

Navier-Stokes equation for the incompressible flow for Newtonian fluids is

$$\rho \left( \frac{\partial u}{\partial t} + u \cdot \nabla u \right) = -\nabla p + \eta \nabla^2 u + f \quad (1)$$

where,  $\rho$  is the density of fluid,  $u$  is flow velocity,  $\eta$  is the viscosity of the fluid,  $f$  is the body force on the fluid.

Simplified Navier-Stokes equation using the above assumptions results as:

$$\frac{\Delta P}{a} = \eta \frac{\partial^2 u_r(z,t)}{\partial z^2} \quad (2)$$

No slip boundary condition:  $u_r\left(\frac{T}{2}, t\right) = u_r\left(-\frac{T}{2}, t\right) = 0$

Integrating Eq.2 twice with respect to  $z$  and using the above boundary conditions, we get

$$u_r(z,t) = \frac{\Delta P}{2a\eta} \left( z^2 - \left( \frac{T(t)}{2} \right)^2 \right) \quad (3)$$

Volumetric flow rate of the oil drainage around the outer radius of the film is given by

$$Q(t) = 2\pi a \int_{-T/2}^{T/2} u_r(z,t) dz$$

or

$$Q(t) = -\frac{\pi \Delta P(t)}{6\eta} T^3(t) \quad (4)$$

Change in the film thickness with time can be written as:

$$\frac{dT}{dt} = \frac{Q(t)}{\pi a^2} \quad (5)$$

Total pressure difference between the two aqueous drops can be written as:

$$\Delta P = \left( \frac{2\gamma_{wa}}{R} + \frac{A_H}{6\pi T(r,t)^3} + \frac{\epsilon_r \epsilon_0 V^2}{2T(r,t)^2} \right) \quad (6)$$

where the 1<sup>st</sup> term corresponds to the Laplace pressure, 2<sup>nd</sup> term corresponds to the long range molecular interaction i.e van der waals interaction where  $A_H$  is Hamakar constant and the 3<sup>rd</sup> term is electrostatic pressure due to the applied voltage between the two aqueous drops.  $\epsilon_r$  is the dielectric constant of the oil,  $\epsilon_0 = 8.85 \times 10^{-12}$  F/m is the vacuum permittivity,  $V$  is the applied ac voltage.

Combining Eq. 4, 5 and 6 results in the rate of change of oil film thickness as:

$$\frac{dT}{dt} = -\frac{1}{3\eta a^2} \left( \frac{\gamma_{wa} T(t)^3}{R} + \frac{A_H}{12\pi} + \frac{\epsilon_r \epsilon_0 V^2 T(t)}{4} \right) \quad (7)$$
